# Supplementary material for: Impact of Palliative Care Services on Treatment and Resource Utilization for Hepatorenal Syndrome in the United States
Source: MDPI journal article supplement (doi:10.3390/medicines8050021), 2021-05-12
Supplement: s1 [file s1]

# Supplementary Materials: Impact of Palliative Care Services on Treatment and Resource Utilization for Hepatorenal Syndrome in the United States

Charat Thongprayoon, Wisit Kaewput, Tananchai Petnak, Oisin A. O’Corragain, Boonphiphop Boonpheng, Tarun Bathini, Saraschandra Vallabhajosyula, Pattharawin Pattharanitima, Ploypin Lertjitbanjong, Fawad Qureshi and Wisit Cheungpasitporn

Table S1. ICD 9 CM codes.

|                                        |                                                                                                                                                                      |
|----------------------------------------|----------------------------------------------------------------------------------------------------------------------------------------------------------------------|
| Hepatorenal syndrome                   | 572.4                                                                                                                                                                |
| Palliative care service                | V66.7                                                                                                                                                                |
| Smoking                                | 305.1, 649.0, 989.84                                                                                                                                                 |
| Alcohol drinking                       | 291.0, 291.1, 291.2, 291.3, 291.4, 291.5, 291.8, 291.81, 291.82, 291.89, 303.00–303.03, 303.90–303.93, 305.00–305.03                                                 |
| Anemia                                 | 283.00–285.9                                                                                                                                                         |
| Obesity                                | 278.0, 278.00, 278.01, 649.10–649.14, 793.91, V85.30–V85.4, V85.54                                                                                                   |
| Diabetes Mellitus                      | 249.00–249.31, 249.40–249.91, 250.00–250.33, 250.40–250.93, 648.00–648.04, 775.1                                                                                     |
| Hypertension                           | 401.xx, 402.00–405.99, 437.2, 642.00–642.24, 642.70–642.94                                                                                                           |
| Dyslipidemia                           | 272.xx                                                                                                                                                               |
| Congestive heart failure               | 428.xx                                                                                                                                                               |
| Chronic kidney disease                 | 585.1, 585.2, 585.3, 585.3, 585.4, 585.5, 585.6, 585.9                                                                                                               |
| HBV cirrhosis                          | 070.2, 070.20, 070.21, 070.22, 070.23, 070.3, 070.30, 070.31, 070.32, 070.33, 070.42, 070.52(hepatitis B)+571.5(cirrhosis)                                           |
| HCV cirrhosis                          | 070.41, 070.44, 070.51, 070.54, 070.7, 070.70, 070.71 (hepatitis C)+571.5 (cirrhosis)                                                                                |
| Alcoholic cirrhosis                    | 571.2                                                                                                                                                                |
| Biliary cirrhosis                      | 571.6                                                                                                                                                                |
| Non-alcoholic steatohepatitis          | 571.8, 571.5, and no codes for hepatitis B or hepatitis C                                                                                                            |
| Hepatocellular carcinoma               | 155.0                                                                                                                                                                |
| Palliative care                        | V66.7                                                                                                                                                                |
| Do not resuscitate status              | V49.86                                                                                                                                                               |
| Atrial flutter/fibrillation            | 427.31, 427.32                                                                                                                                                       |
| Coronary artery disease                | 410.xx, 411.xx, 412.xx, 413.xx, 414.xx                                                                                                                               |
| Ventricular arrhythmia /Cardiac arrest | 427.1, 427.41, 427.5                                                                                                                                                 |
| Invasive mechanical ventilation        | 96.70–96.73                                                                                                                                                          |
| Non-invasive ventilation               | 93.90                                                                                                                                                                |
| Renal replacement therapy              | 39.95, v45.1, v56.0, v56.1, 54.98, v56.2, v56.32                                                                                                                     |
| Blood transfusion                      | 99.00–99.07                                                                                                                                                          |
| Enteral nutrition                      | 96.6                                                                                                                                                                 |
| Paracentesis                           | 54.91                                                                                                                                                                |
| Gastrointestinal bleeding              | 456.0, 456.20, 530.82, 531.00–531.41, 531.60, 531.61, 532.00–532.41, 532.60–532.61, 533.00–533.41, 533.60, 533.61, 534.00–534.41, 534.60, 569.3, 578.0, 578.1, 578.9 |

|                         |                                                                                                                                                                                                 |
|-------------------------|-------------------------------------------------------------------------------------------------------------------------------------------------------------------------------------------------|
| Bloodstream infections  | 003.1, 036.2, 036.42, 038.4, 038.40, 038.41, 038.42, 038.43, 038.44, 038.49, 038.3, 038.0, 038.1, 038.10, 038.11, 038.12, 038.19, 038.2, 112.5, 112.81, 117.9, 038.8, 038.9, 449, 790.7, 995.92 |
| Septic shock            | 785.52                                                                                                                                                                                          |
| Acute organ dysfunction |                                                                                                                                                                                                 |
| Acute kidney injury     | 584, 584.5, 584.6, 584.7, 584.8, 584.9 (exclude 585.5, 585.6)                                                                                                                                   |
| Respiratory failure     | 518.81, 518.82, 518.85, 786.09, 799.1, 96.7, 96.70, 96.71, 96.72                                                                                                                                |
| Circulatory failure     | 458.8, 458.9, 785.5, 785.50, 785.51, 785.52, 785.59, 796.3                                                                                                                                      |
| Liver failure           | 570, 572.2, 573.3, 573.4                                                                                                                                                                        |
| Neurological failure    | 293, 293.0, 293.1, 293.8, 293.81, 293.82, 293.83, 293.84, 293.89, 293.9, 348.1, 348.3, 348.30, 348.31, 780.01, 780.09, 48.39, 89.14                                                             |
| Hematologic failure     | 286.6, 286.7, 286.9, 287.49, 287.5                                                                                                                                                              |
